# Supplementary material
Source: publisher figshare collection journal article supplement (https://acs.figshare.com/ndownloader/files/5576340)
Supplement: Supplementary file 1 [file 5576340]

# Supporting Information

**Development of a Split SNAP-CLIP Double Labeling System for Tracking Proteins**

**Following Dissociation from Protein–Protein Complexes in Living Cells**

Masayasu Mie, Tatsuhiko Naoki, Eiry Kobatake

Department of Life Science and Technology,

School of Life Science and Technology,

Tokyo Institute of Technology

4259 Nagatsuta, Midori-ku, Yokohama 226-8502, Japan

\*mie.m.aa@m.titech.ac.jp

## Materials and Methods

### *Construction of Plasmids*

The pcDNA-FKBP12-nCLIP(1–91)-(GGGS)<sub>3</sub>-cSNAP(109–182) plasmid was constructed as follows. Using pcDNA-F<sub>M</sub>-nCLIP(1–91)-(GGGS)<sub>3</sub>-cSNAP(109–182) as a template, point mutagenesis was performed with the primer set FMtoFKBP12S and FMtoFKBP12AS, followed by sequence confirmation.

The pcDNA-FRB-cCLIP(92–182)-(GGGS)<sub>3</sub>-nSNAP(1–122) plasmid was constructed as follows. The cCLIP(92–182)-(GGGS)<sub>3</sub>-nSNAP(1–122) fragment derived from pcDNA-F<sub>M</sub>-cCLIP(92–182)-(GGGS)<sub>3</sub>-nSNAP(1–122) by digestion with *Kpn* I and *Not* I was inserted into the suitably digested pcDNA-NLS-FRB-cSNAP(109–182) plasmid.

Using the resulting plasmid, (pcDNA-NLS-FRB-cCLIP(92–182)-(GGGS)<sub>3</sub>-nSNAP(1–122)), as a template, deletion mutagenesis was performed with the primer set FRB signal deletion S and FRB signal deletion AS to remove the NLS sequences, followed by sequence confirmation.

The pcDNA-F<sub>M</sub>-nSNAP(1–122) and pPKC $\alpha$ -F<sub>M</sub>-nSNAP(1–122) plasmids were constructed as follows. The nSNAP(1–122) fragment derived from pUC-nSNAP(1–122) by digestion with *EcoR* I and *Kpn* I was cloned into the suitably digested pcDNA-F<sub>M</sub>-cCLIP and pPKC $\alpha$ -F<sub>M</sub>-cSNAP plasmids, respectively. The

resulting plasmids were termed pcDNA-F<sub>M</sub>-nSNAP(1–122) and pPKC $\alpha$ -F<sub>M</sub>-nSNAP(1–122), respectively. The pcDNA-F<sub>M</sub>-cSNAP(109–182) and pPKC $\alpha$ -F<sub>M</sub>-nSNAP(109–182) plasmids were constructed according to the same procedure using pUC-cSNAP(109–182) instead of pUC-nSNAP(1–122).

#### *SNAP-tag Fragment Complementation Study*

For SDS-PAGE analysis, HeLa cells were coexpressed with all combinations of nSNAP-FKBP12 and NLS-FRB-cSNAP. After transfection, transfected cells were incubated with cell culture medium containing rapamycin (final concentration: 1  $\mu$ M) for 60 min. After washing, cells were incubated with cell culture medium in the presence of the SNAP-tag substrate SNAP-Cell Oregon Green (final concentration: 500 nM) for 20 min. Then, cells were harvested using a cell scraper with 30  $\mu$ L of cold phosphate-buffered saline (PBS) containing 0.1% Nonident P-40. Collected cells were sonicated and centrifuged to remove insoluble debris. The supernatant (10  $\mu$ L) was separated by SDS-PAGE, and labeled proteins were detected by a fluorescence scanner.

#### *Split SNAP-tag Double Labeling System Study*

Cells expressing FKBP12-nCLIP(1–91)-(GGGS)<sub>3</sub>-cSNAP(109–182) and

FRB-cCLIP(92–182)-(GGGS)<sub>3</sub>-nSNAP(1–122) were incubated in cell culture medium in the presence of SNAP-Cell Oregon Green and CLIP-Cell TMR-Star (final concentration: 250 nM each) for 60 min with or without rapamycin during labeling. After washing, cells were incubated with cell medium for 2 h to remove unreacted substrate, and subsequently observed by confocal laser scanning microscopy.

Table S1

## Primers used in this study

| Name                   | Sequence                                                                                                           |
|------------------------|--------------------------------------------------------------------------------------------------------------------|
| nSNAP(s)               | GCTAGGTACCGCTAGCGCCATGGACAAAGACTGCGAA                                                                              |
| nSNAP(1–72 as)         | CCCGAATTCAAAGCTTCTGGTGAAAGTAGGCGTTGA                                                                               |
| nSNAP(1–91 as)         | CCCGAATTCAAAGCTTCTGCTGGAACACTGGGTGGT                                                                               |
| nSNAP(1–108 as)        | CCCGAATTCAAAGCTTGAAGCTTCACCACTTTCAGCA                                                                              |
| nSNAP(1–122 as)        | CCCGAATTCAAAGCTTGCCGGCCAGGGCGGCCAGCT                                                                               |
| cSNAP-1(as)            | GCCGAATTCAAAGCTTTCCTCTCGAGGGATCCTGGC                                                                               |
| cSNAP(73–182 s)        | GCTAGGTACCATGGTCGACCCTGAGGCCATCGAGGAGTT                                                                            |
| cSNAP(92–182 s)        | GCTAGGTACCATGGTCGACGAGAGCTTTACCCGCCAGGT                                                                            |
| cSNAP(109–182 s)       | GCTAGGTACCATGGTCGACGGAGAGGTCATCAGCTACCA                                                                            |
| cSNAP(123–182 s)       | GCTAGGTACCATGGTCGACAATCCCGCCGCCACCGCCGC                                                                            |
| FRB(s)                 | GCTAGCCTCGAGATGGCTTCTAGAATCCTC                                                                                     |
| FRB(as)                | GAATTCTTAGGTACCCTTTGAGATTCGTGGAACAC                                                                                |
| nCLIP-Linker(as)       | GGGGAATTCGCTAGCTGATCCTCCTCCTGATCCTCCTCCT<br>GATCCTCCTCCACCCAGCCCAGGCTTGCCCAGTCTGTGG<br>CCCTCGTGGGCCAGCAGCCACTCTTTC |
| FM to FKBP12 S         | AAGAAATTTGATTCCTCCCGGGACAGA                                                                                        |
| FM to FKBP12 AS        | GGAATCAAATTTCTTTCCATCTTCAAG                                                                                        |
| FRB signal deletion S  | GGCTAGCCTCGAGATGGCTTCTAGA                                                                                          |
| FRB signal deletion AS | ATCTCGAGGCTAGCCAGCTTGGGTCT                                                                                         |

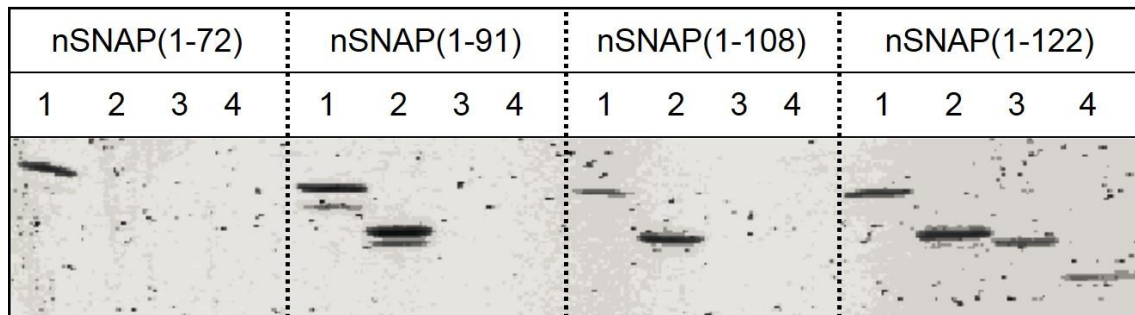

Figure S1. SDS-PAGE analysis of SNAP-tag fragment complementation. All combinations of nSNAP-FKBP12 and NLS-FRB-cSNAP were coexpressed in HeLa cells. After exposure to rapamycin, cells were incubated with SNAP-Cell Oregon Green. The labeled cSNAP fragments were detected by a fluorescence scanner.  
1:cSNAP(73–182); 2:cSNAP(92–182); 3:cSNAP(109–182); 4:cSNAP(123–182).

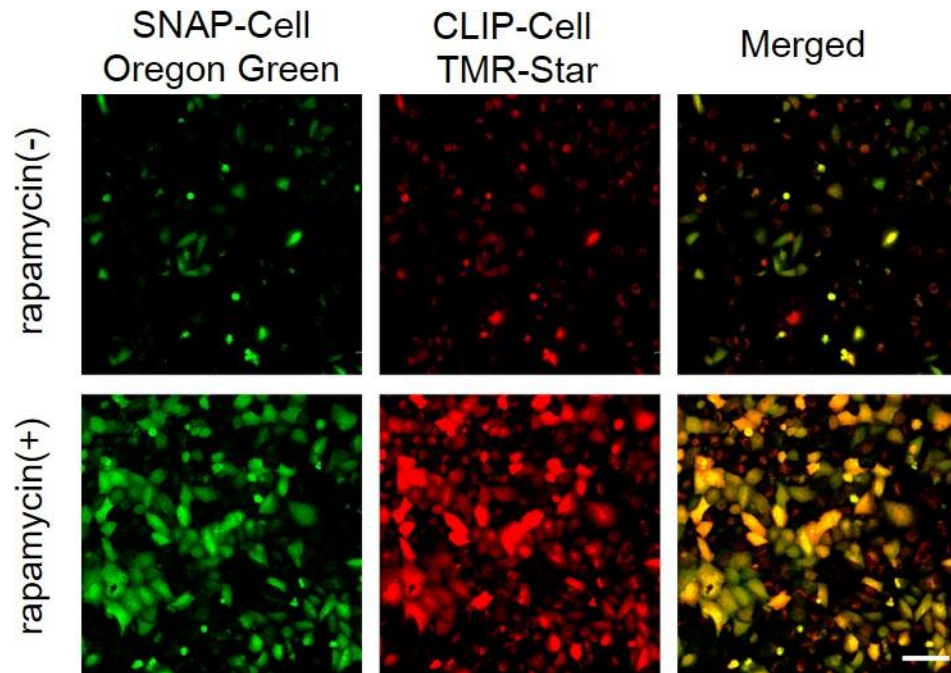

Figure S2. Split SNAP-CLIP double labeling system with FKBP12-rapamycin-FRB interaction. Cells coexpressing FKBP12-nCLIP(1–91)-(GGGS)<sub>3</sub>-cSNAP(109–182) and FRB-cCLIP(92–182)-(GGGS)<sub>3</sub>-nSNAP(1–122) were cultured with or without rapamycin, before addition of SNAP-Cell Oregon Green and CLIP-Cell TMR-Star. The scale bar represents 100  $\mu$ m.

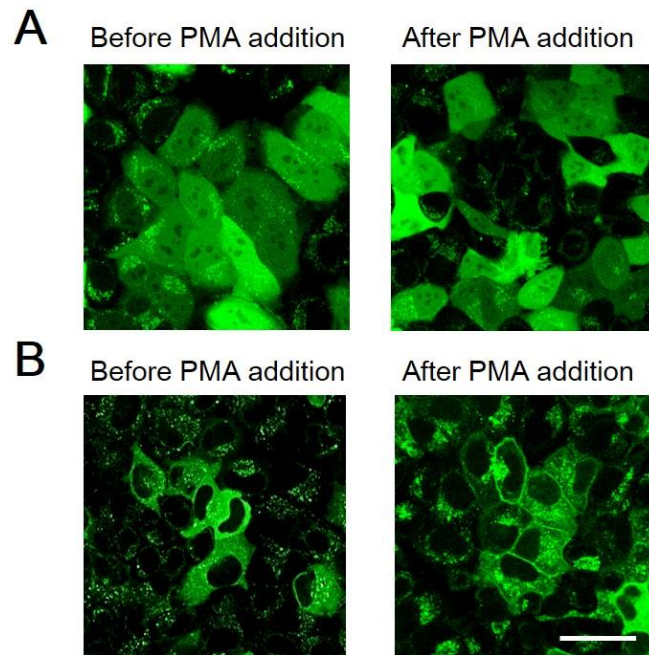

Figure S3. Tracking proteins following F<sub>M</sub> homodimer dissociation induced by addition of FK506. Cells expressing (A) PKC $\alpha$ -F<sub>M</sub>-nSNAP(1-122) and F<sub>M</sub>-cSNAP(109-182), and (B) F<sub>M</sub>-nSNAP(1-122) and PKC $\alpha$ -F<sub>M</sub>-cSNAP(109-182). Fluorescently labeled PKC $\alpha$ -F<sub>M</sub>-cSNAP(109-182) was observed at different places before and after addition of PMA. The scale bar represents 50  $\mu$ m.



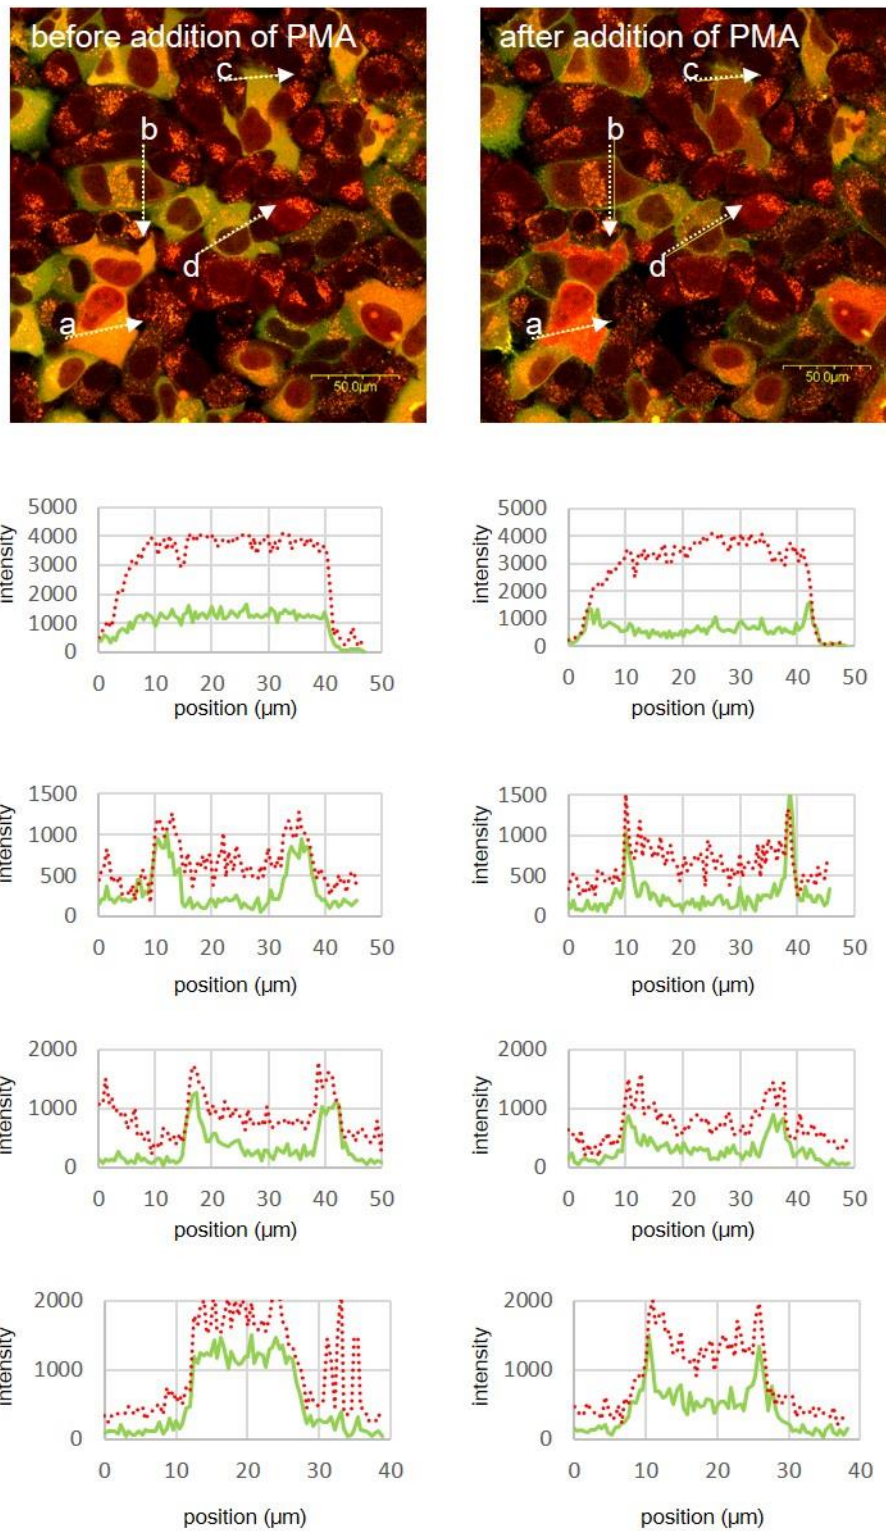

Figure S4. The differences of fluorescence signal intensity across the cells before and after addition of PMA analyzed by FLUOVIEW software (Olympus).
